# Supplementary material for: Sensory sustainable homes, a study of the healthy happy home (3H) conceptual design model: an explanatory qualitative study
Source: Frontiers journal article supplement (doi:10.3389/frsc.2025.1506672), 2025-02-20
Supplement: Table_1.docx [file Table_1.docx]

**APPENDIX 1: INTERVIEW SCHEDULE**

**Sensory Sustainable Homes, A Study of the Healthy Happy Home (3H) Conceptual Design Model: An Explanatory Qualitative Study**

**Instructions:**

This semi-structured interview schedule is used for the participants, including architects, town planners/construction companies, psychologists, sociologists, environment specialists, medical doctors, art historians, prospective beneficiaries/inhabitants, etc. The interviewer first has to build a satisfactory rapport with the interviewee. The investigators told the participants to be brief about the purpose of the study. It should be clear that the data gathered from this interview would be highly confidential and used for academic purposes only.

**Demographic Information:**

Area of expertise / Category of the interviewee: _____________________________

Brief portfolio of the interviewee:

| **A** | **BACKGROUND/DEMOGRAPHICS QUESTIONS** | **RESPONSE/ANSWERS** |
| --- | --- | --- |
| 1. | What is your name? |  |
| 2. | What is your age? |  |
| 3. | What is your highest educational level? |  |
| 4. | What is your religion? |  |
| 5. | What is your gender? |  |
| 6. | Are you married? |  |
| 7. | What is your tribe, language & culture? |  |
| 8. | Where is your place of birth? |  |
| 9. | What is your profession/occupation? |  |

While designing a house, what factors do you recommend should be addressed so that the house can be more and more mentally healthy-friendly?

______________________________________________________________________________

While designing a township, what factors do you recommend so that the community can be more and more mental health-friendly?

______________________________________________________________________________

What is happiness?

Is happiness a mental state of well-being?

What is a home? Is a home different from a house or any other space?

If proper, how do we incorporate the features/determinants of happiness in the home or the neighbourhood?

What feature excites human happiness genes/hormones in residential spaces?

How do we incorporate the needs of man proposed by the different scholars into the residential structure and neighbourhood? Like -

**Physiological Needs:** air, food, water, shelter, warmth, sleep, etc.

**Security Needs:** safety, shelter, security, law & order, employment, health, stability, etc.

**Social Needs:** Belongingness, love, affection, intimacy, family, friends, relationships, etc.

**Esteem Needs** self-esteem, self-confidence, achievement, recognition, status, respect, etc.

**Cognitive needs:** Need to know and understand (knowledge, meaning, understanding, etc.).

**Aesthetic needs:** need to express oneself in pleasing ways, appreciation and search for beauty, balance, form, etc.

**Self-actualising Needs**: realising personal potential, self-fulfilment, pursuing talent, personal growth, peak experiences, etc.

**Transcendence needs:** helping others to achieve self-actualisation.

______________________________________________________________________________

What is the possibility of including the pleasure principle of Sigmund Freud in the residential neighbourhood in the housing community?

______________________________________________________________________________

What features/elements in a healthy residential neighbourhood allow the flow of a Sense of Community, Sense of aesthetics, and sense of belongingness?

______________________________________________________________________________

What might be facilities/infrastructure provided in a residential neighbourhood that would encourage enjoyment/excitement, Celebrations, love, joy and togetherness?

______________________________________________________________________________

Suppose you are asked to enumerate facilities/infrastructures, conditions, elements, determinants, and so on of **physical and mental health** and prevent possible medical allergies, injuries or other medical issues to create a healthy built environment where residents enjoy psychosocial well-being/wellness. What might those be?

______________________________________________________________________________
