# Supplementary material for: Sensory sustainable homes, a study of the healthy happy home (3H) conceptual design model: an explanatory qualitative study
Source: Frontiers journal article supplement (doi:10.3389/frsc.2025.1506672), 2025-02-20
Supplement: Table_2.docx [file Table_2.docx]

**APPENDIX 2 - INTERVIEW SCHEDULE**

**Sensory Sustainable Homes, A Study of the Healthy Happy Home (3H) Conceptual Design Model: An Explanatory Qualitative Study**

**Instructions:**

This is a semi-structured interview schedule used for interviewees. These include- architects; Town Planner / Constructing Companies, psychologists, sociologists, environmental specialists (environmental biologists and environmental chemists); Medical Doctors; Materials Engineers, service Engineers (Mechanical, Electrical, Civil and Structural), builders, art Historian, beneficiaries/ Inhabitants/residents’, etc. The interviewer first has to build a satisfactory rapport with the interviewee. The investigator told the participant to be brief about the purpose of the study. However, data gathered from this interview would be highly confidential and used for academic purposes only.

**Demographic Information:**

Area of expertise / Category of the interviewee: _____________________________

Brief portfolio of the interviewee:

| **A** | **BACKGROUND/DEMOGRAPHICS QUESTIONS** | **RESPONSE/ANSWERS** |
| --- | --- | --- |
| 1. | What is your name? |  |
| 2. | What is your age? |  |
| 3. | What is your highest educational level? |  |
| 4. | What is your religion? |  |
| 5. | What is your gender? |  |
| 6. | Are you married? |  |
| 7. | What is your tribe, language & culture? |  |
| 8. | Where is your place of birth? |  |
| 9. | What is your profession/occupation? |  |

What is health?

What is well-being?

What is an indoor and outdoor pollutant (environmental pollutants)?

What is a healthy home?

What is a healthy built environment?

What is happiness?

Is happiness a mental state of well-being?

If yes explain

Is there a relationship between health and happiness?

If yes, then explain.

What is a home? Is a home different from a house?

There are pollutants in the environment, according to research, but these pollutants

/contaminants are harmful to residents in homes and built environments. What are the identifiable causes of pollutants in the indoor and outdoor spaces of the home?

How are these pollutants/contaminants transmitted, and through which media are they transmitted to the residents/ occupants of the home and the environment?

How can these pollutants/contaminants be categorised in homes and the environment?

Can you please mention these environmental contaminants/pollutants, both indoors and outdoors, that affect residents in the home/built environments?

These contaminants/pollutants cause diseases/ailments/ill-health/allergies amongst residents/occupants of a home/environment. Can you please mention these diseases/allergies?

At what threshold must these pollutants/contaminants get before they injure residents/occupants’ health?

Seeing that these pollutants affect residents’ health/well-being, which in turn affects their happiness and ultimately reduces their life-expectancy ratio. What are the preventive or precautionary measures to forestall and eradicate these killer substances from the indoor and outdoor environments of the home?

What feature excites human happiness genes/hormones in residential spaces?

While designing a home or residential community, what factors should you recommend so that the house can be more and more health-friendly?

What might be the facilities/infrastructure to be provided in a residential neighbourhood that would encourage excitement, celebrations, love, joy, a sense of community, aesthetics, belongingness and togetherness?

Suppose you are asked to enumerate facilities/infrastructures, conditions, elements, determinants, and indicators of **health (**physical, mental and social**)** and possible medical allergies, injuries or other medical preventions that would create a healthy built environment where residents enjoy well-being/wellness. What might those be?

As your parting shot, what would you advise urban residents, homeowners and property developers to do when designing, constructing and creating or owning a home/housing community to provide a healthy, happy home and residential community that would increase life expectancy?
