# Supplementary material for: Sensory sustainable homes, a study of the healthy happy home (3H) conceptual design model: an explanatory qualitative study
Source: Frontiers journal article supplement (doi:10.3389/frsc.2025.1506672), 2025-02-20
Supplement: Table_4.docx [file Table_4.docx]

**APPENDIX 4 - OBSERVATION GUIDE**

**Sensory Sustainable Homes, A Study of the Healthy Happy Home (3H) Conceptual Design Model: An Explanatory Qualitative Study**

| Facility Name and Location:  Nature of Facility (Homes):  Observation Date: | | | |
| --- | --- | --- | --- |
| **S/N** | **Sensory Sustainable Elements** | **Checklist of Sustainable Home Design Solutions and Description** | **Illustrations, Diagrams & Pictures** |
| 1 | Environmentally Friendly Considerations | Building Orientation And Layout |  |
| Design the home to maximise access to views & nature, Landscaping. |
| Use a balance of soft and hard Landscaping. |
| Use water-wise plants. |
| Therapeutic Garden |
| 2 | Health | Natural light and Fresh air |  |
| Use non-harmful building materials. |
| Artwork, plants & Healing Process in Home |
| Use eco-paints in the interior and exterior. |
| 3 | Ventilation | Use low-running cost appliances |  |
| Ventilate roofs to enable the roof space to renew the air compressed in the roof space. |
| Locate windows and doors to allow good natural cross-ventilation |
| 4 | Insulation | Reevaluate your home’s insulation. |  |
| Sensory stimulations |
| Include maximum insulation in the roof, walls and floor. |
| 5 | Roofing | Use Light-Coloured Roofing |  |
| Fit a cool roof. |
| Use green roof |
| 6 | Energy | Install energy-efficient appliances. |  |
| Design to Reduce the use of energy for lighting, ventilation, heating and cooling |
| Install a renewable energy source such as a photovoltaic system. |
| Install a solar hot water system. |
| Design the home layout to reduce artificial heat or cool the whole home. |
| 7 | Materials Efficiency | Low Maintenance materials. |  |
| Natural materials |
| Use recycled materials |
| 8 | Windows | Install high-performance windows. |  |
| Large openable windows |
| Easy face windows |
| Living room windows to allow efficient natural lighting all year round |
| 9 | Water | Grey water & Rainwater (recollection & reuse) |  |
| Use water-efficient technologies |
| The use of water in the landscape to enhance the natural light in the home |
| The use of rainwater in the interior and exterior to reduce the cooling load |
