# Supplementary material for: Sensory sustainable homes, a study of the healthy happy home (3H) conceptual design model: an explanatory qualitative study
Source: Frontiers journal article supplement (doi:10.3389/frsc.2025.1506672), 2025-02-20
Supplement: Table_5.docx [file Table_5.docx]

**APPENDIX 5- INFORMED CONSENT FORM**

**Department of Humanities Ethics Review Committee @ COMSATS University Islamabad, Islamabad Campus, Pakistan**

Good morning/afternoon. I am **Dr Eghosa Noel Ekhaes**e (principal researcher). I am a Post-doctoral researcher at COMSATs University, Islamabad, Pakistan, researching **“Sensory Sustainable Homes, A Study of the Healthy Happy Home (3H) Conceptual Design Model: An Explanatory Qualitative Study*”*** towards a research project (book) to be published. I am asking you some questions about Sensory Sustainable Home, Healthy Home elements, Happy Home determinants, Home, Healthy-Happy Home Concept, Healthy-Happy Neighbourhood, *and Psychosocial-well-being components in a home.* Thank you for choosing to take part in this study. I will be interviewing you today. Before we start the interview, I will briefly explain the research and answer any questions you may have.

**The Aims of the Study**

This article aims to assess expert opinions from relevant health and environmental professionals on their perspective and understanding of health, happiness and home to develop a 3H conceptual design framework. This study may help understand how to improve people’s health and well-being in a residential home, neighbourhood and community.

**Data Collection**

The interview should take between 60 and 90 minutes. During the interview and discussion, I will be asking you about your experiences, thoughts and opinions about the home, happiness and healthy home elements, happy home determinants and psychosocial well-being/health components in a home. With your permission, the interview will be video and audio-recorded. The interview will be transcribed to analyse the conversation.

**Confidentiality**

This information is for academic purposes only. I am asking for your help to ensure the information I collect is accurate. You may refuse to answer any question or choose to stop the interview at any time. Also, be assured that we will treat your response with strict confidentiality.

I will now complete a form with some background information about you. It will allow us to get some context about the results of this study. Thank you. We are now ready to start the interview.

Do you have any questions about the exercise?

Do I have your agreement to proceed?

Respondent’s signature and date

……………………………………………….

(Indicates the respondent’s willingness to participate)
